# Supplementary material for: Early effect of the Covid-19 epidemic on vaccine coverage of major antigens in Guinea: an analysis of the interrupted time series of national immunization coverage
Source: bioRxiv or medRxiv preprint supplement (doi:10.1101/2020.09.11.20192161), 2020-10-25
Supplement: Supplementary file [file 2020.09.11.20192161-1.pdf]

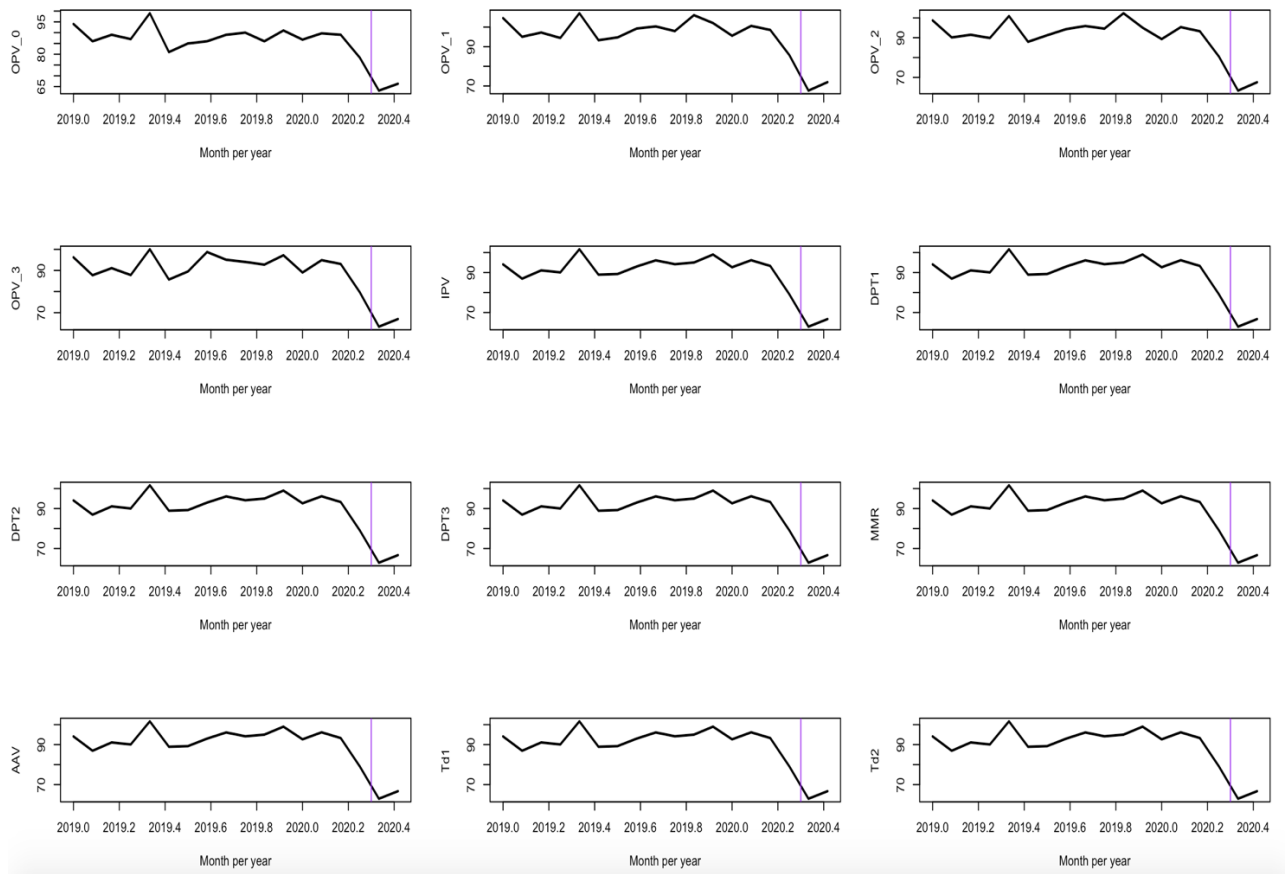

Figure 1. Trends in vaccine coverage in 2019 and 2020
